# Supplementary material
Source: PubMed Central journal article supplement (PMC6177588)
Supplement: supp_RA118.004452_138800_2_supp_189203_pdx2rs.pdf [file supp_RA118.004452_138800_2_supp_189203_pdx2rs.pdf]

The non-enzymatic RAS effector RASSF7 inhibits oncogenic c-Myc function

**Anbarasu Kumaraswamy<sup>1</sup>, Anitha Mamidi<sup>1</sup>, Pavitra Desai<sup>1</sup>, Ananthi Sivagnanam<sup>1</sup>  
Lakshmi Revathi Perumalsamy<sup>1</sup>, Chandrasekaran Ramakrishnan<sup>2</sup>, Michael Gromiha<sup>2</sup>,  
Krishnaraj Rajalingam<sup>3</sup> and Sundarasamy Mahalingam<sup>1\*</sup>**

<sup>1</sup>National Cancer Tissue Biobank, Laboratory of Molecular Cell Biology, <sup>2</sup>Protein Bioinformatics Laboratory, Bhupat and Jyoti Mehta School of Biosciences, Department of Biotechnology, Indian Institute of Technology-Madras, Chennai, India;

<sup>3</sup>MSU-FZI, Institute of Immunology, University Medical Center Mainz, JGU, Mainz, Germany

**Running Title:** *RASSF7 regulates c-Myc function*

\*To whom correspondence should be addressed: Sundarasamy Mahalingam, Laboratory of Molecular Cell Biology, Room No: 403, Department of Biotechnology, Indian Institute of Technology-Madras, Chennai 600036, India; mahalingam@iitm.ac.in; Tel: (+91-44) 22574130; FAX: (+91-44) 22574102.

**Keywords:** RASSF7, c-Myc, Ubiquitination, Tumorigenesis, Cell Penetrating Peptide, Peptide Inhibitor, Cell Proliferation, Cancer, MAX, Transcription Factor

---

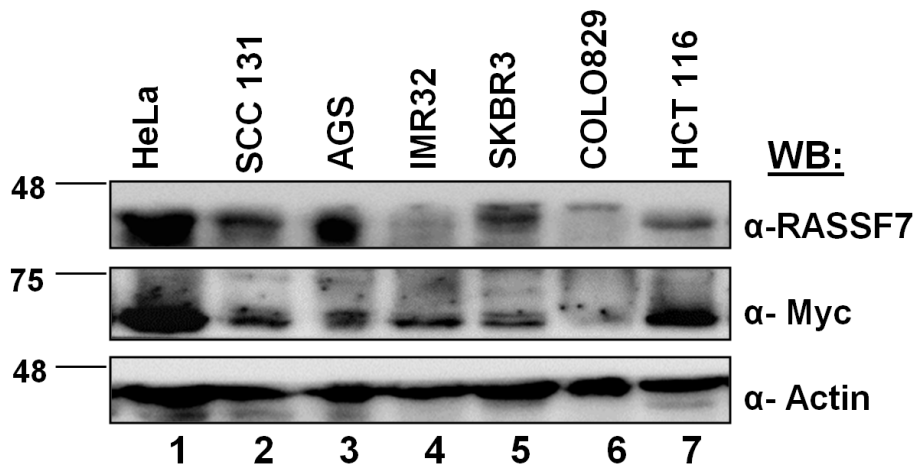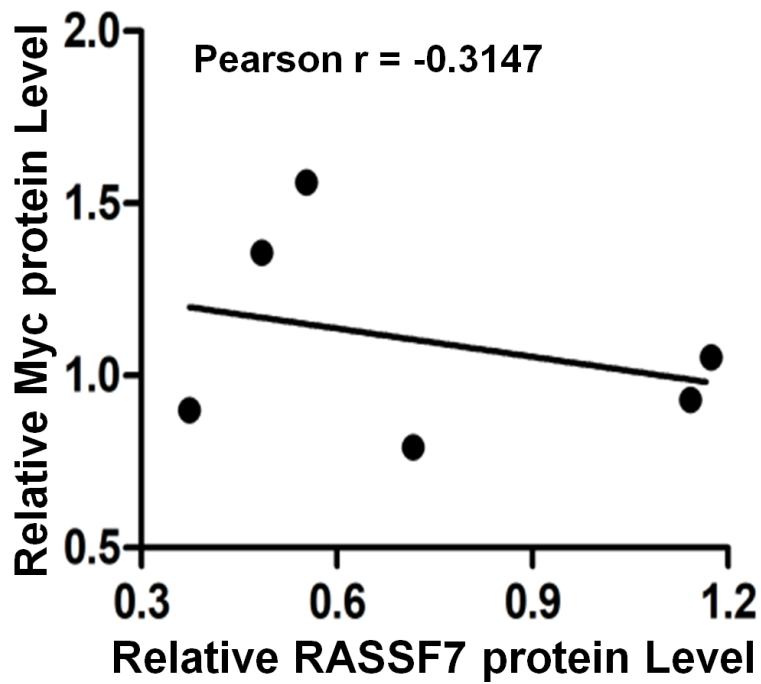

**Figure: S1**

Western blot analysis in cancer cell lines reveals the existence of inverse correlation between RASSF7 and c-Myc protein levels. Densitometry analysis was performed for RASSF7 and Myc protein levels normalized to Actin.

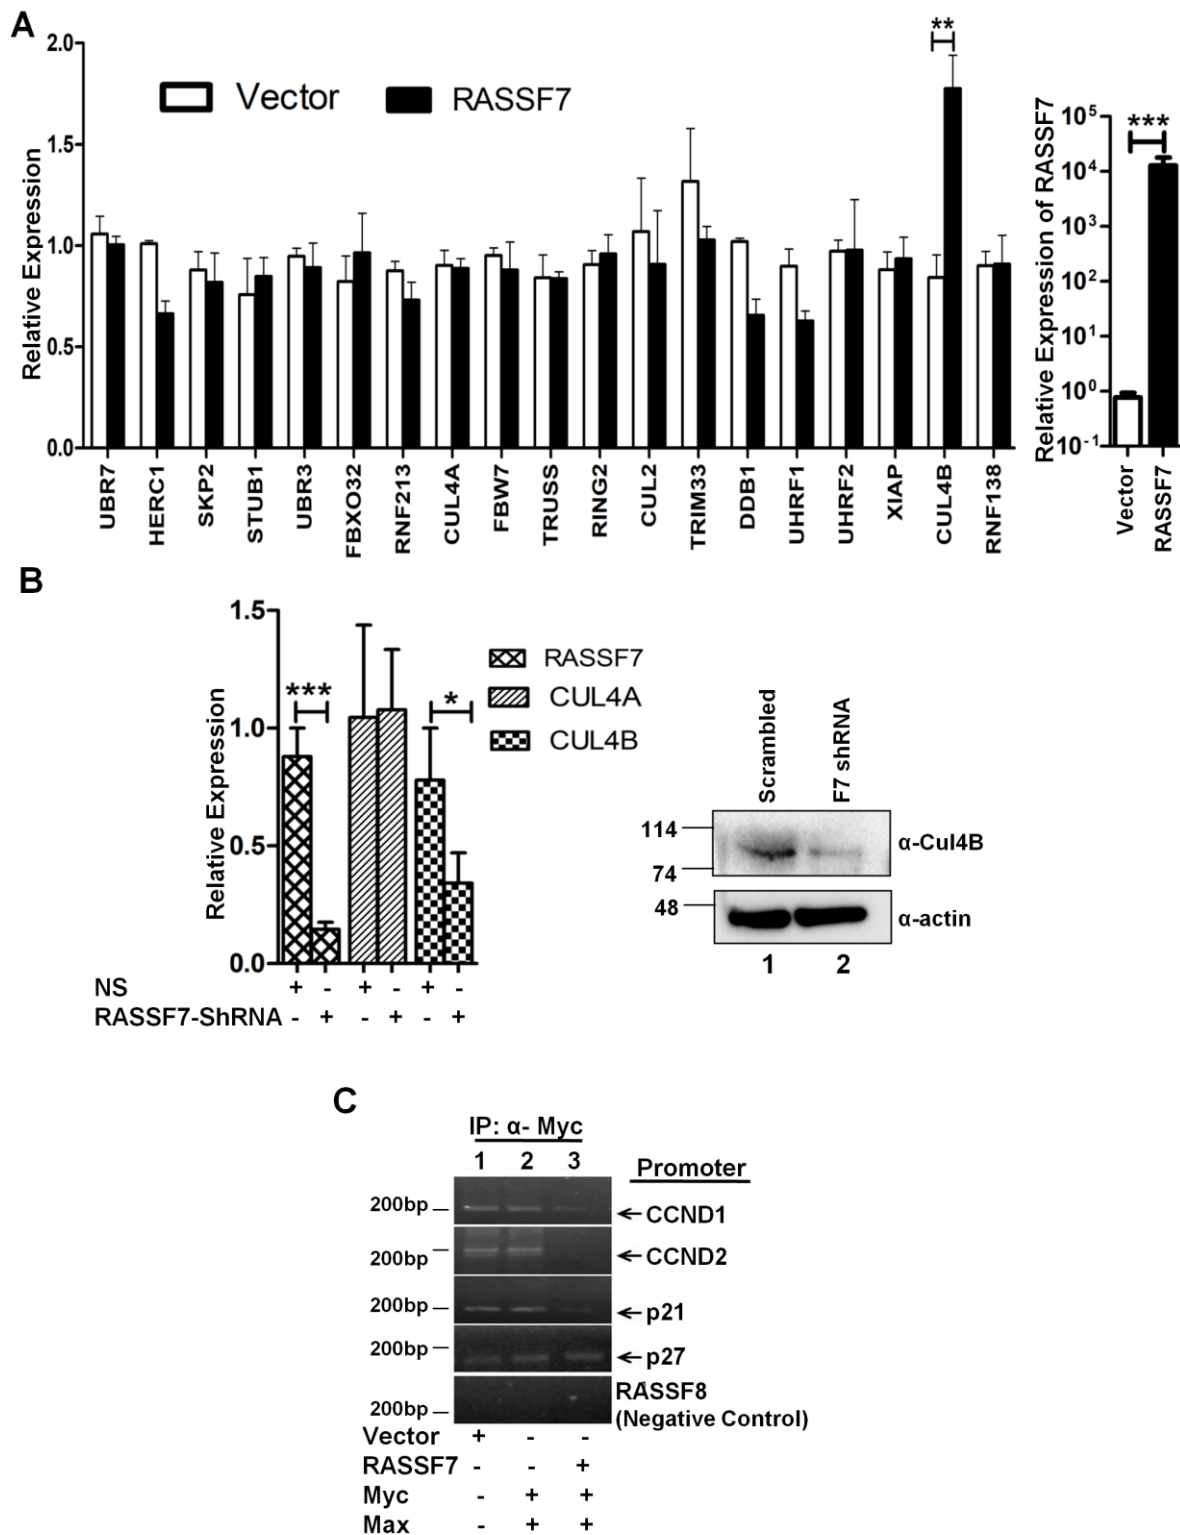

**Figure: S2**

**(A)** RT-qPCR analysis of different E3 ligases expression in presence of RASSF7 in HEK293T indicates that Cullin4B (CUL4B) was significantly upregulated. Beta-actin served as internal control. **(B)** RT-qPCR and western blot analyses indicate that depletion of RASSF7 reduces endogenous CUL4B expression levels. Beta-actin served as internal control (n=3 and data is expressed as mean $\pm$ SD). **(C)** Chromatin immunoprecipitation assay reveals that RASSF7 alters c-Myc occupancy on target promoters. RASSF8 promoter lacking c-Myc binding site served as negative control.

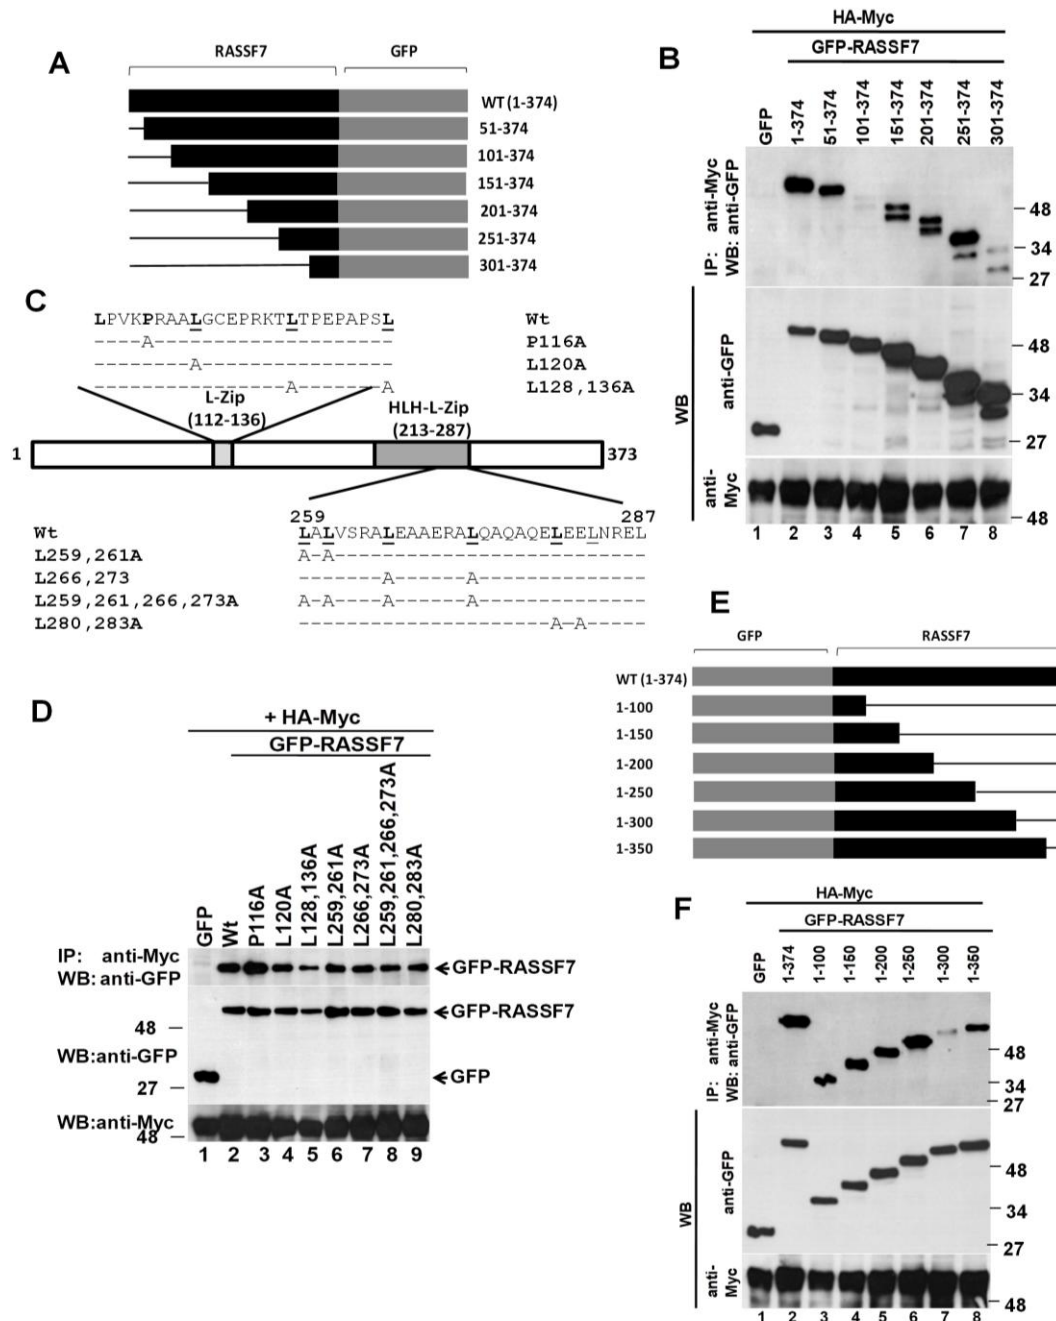

**Figure: S3**

(A) Schematic diagram indicating the wild-type and N-terminal deletion mutants of RASSF7. (B) Various indicated N-terminal deletion mutants of RASSF7 were expressed in HEK293T cells and performed immunoprecipitation assay using anti-c-Myc antibodies. Results indicate that all RASSF7 mutants are interacting with c-Myc. (C) Schematic representation L-Zip and HLH-L-Zip domains mutants of RASSF7. All underlined amino acids were mutated with alanine as described in Materials and Methods. (D) Immunoprecipitation analysis with HEK293T cell lysates indicated that all L-Zip and HLH-L-Zip domains mutants of RASSF7 are able to interact with c-Myc. (E) Line diagram indicating the wild-type and C-terminal deletion mutants of RASSF7. (F) All indicated C-terminal deletion mutants of RASSF7 were expressed in HEK293T cells and performed immunoprecipitation assay using anti-c-Myc antibodies. Results indicate that all RASSF7 mutants are interacting with c-Myc.

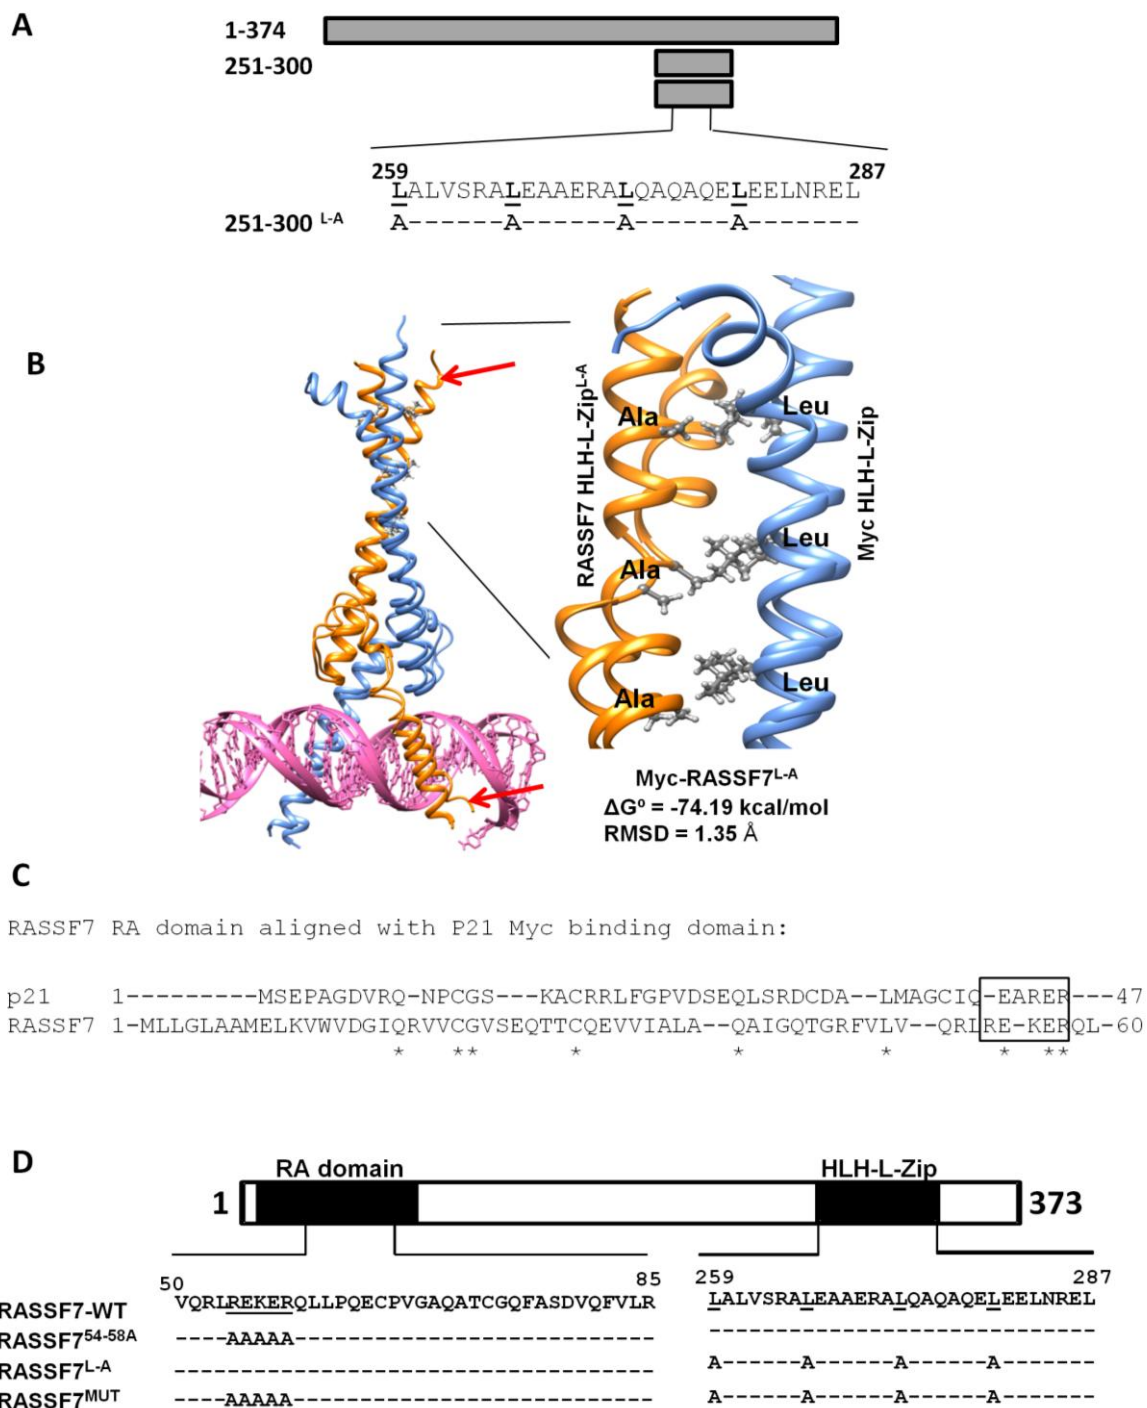

**Figure: S4**

**(A)** Schematic representation of HLH-L-Zip domain mutants of RASSF7. All underlined amino acids were mutated with alanine as described in Materials and Methods. **(B)** Snapshot of c-Myc-RASSF7<sup>L-A</sup> heteromeric complex shows reduced stability (indicated by arrows). The lack of interaction between mutated alanine (RASSF7 chain) and leucine (c-Myc chain) are showed as magnified image. **(C)** Alignment of amino acid sequences from p21 domain interacting with c-Myc with RA domain of RASSF7 indicating a conservation between these domains (indicated in box). **(D)** Schematic line diagram of RASSF7 containing mutations RA domain and HLH-L-Zip domain. All underlined amino acids were mutated with alanine as described in Materials and Methods.

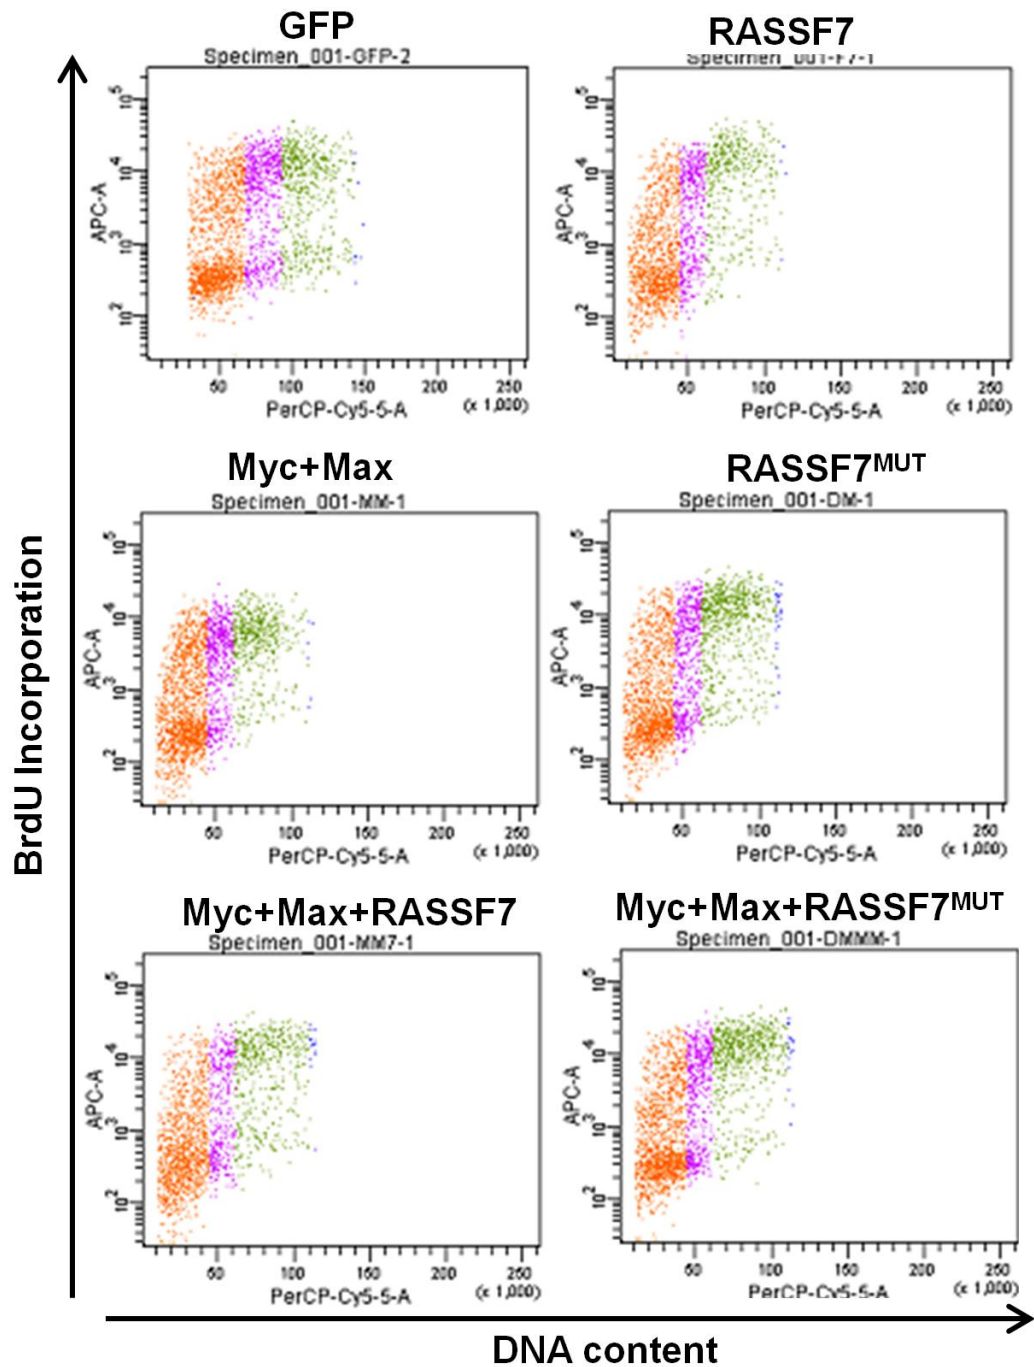

**Figure: S5**

Representative BrdU assay bivariate plots of HEK293T cells upon co-expression of wild-type RASSF7 or c-Myc interaction deficient mutant of RASSF7 (RASSF7<sup>MUT</sup>) with c-Myc and Max. The DNA stained with 7-AAD is represented in X-axis and BrdU incorporation in Y-axis.



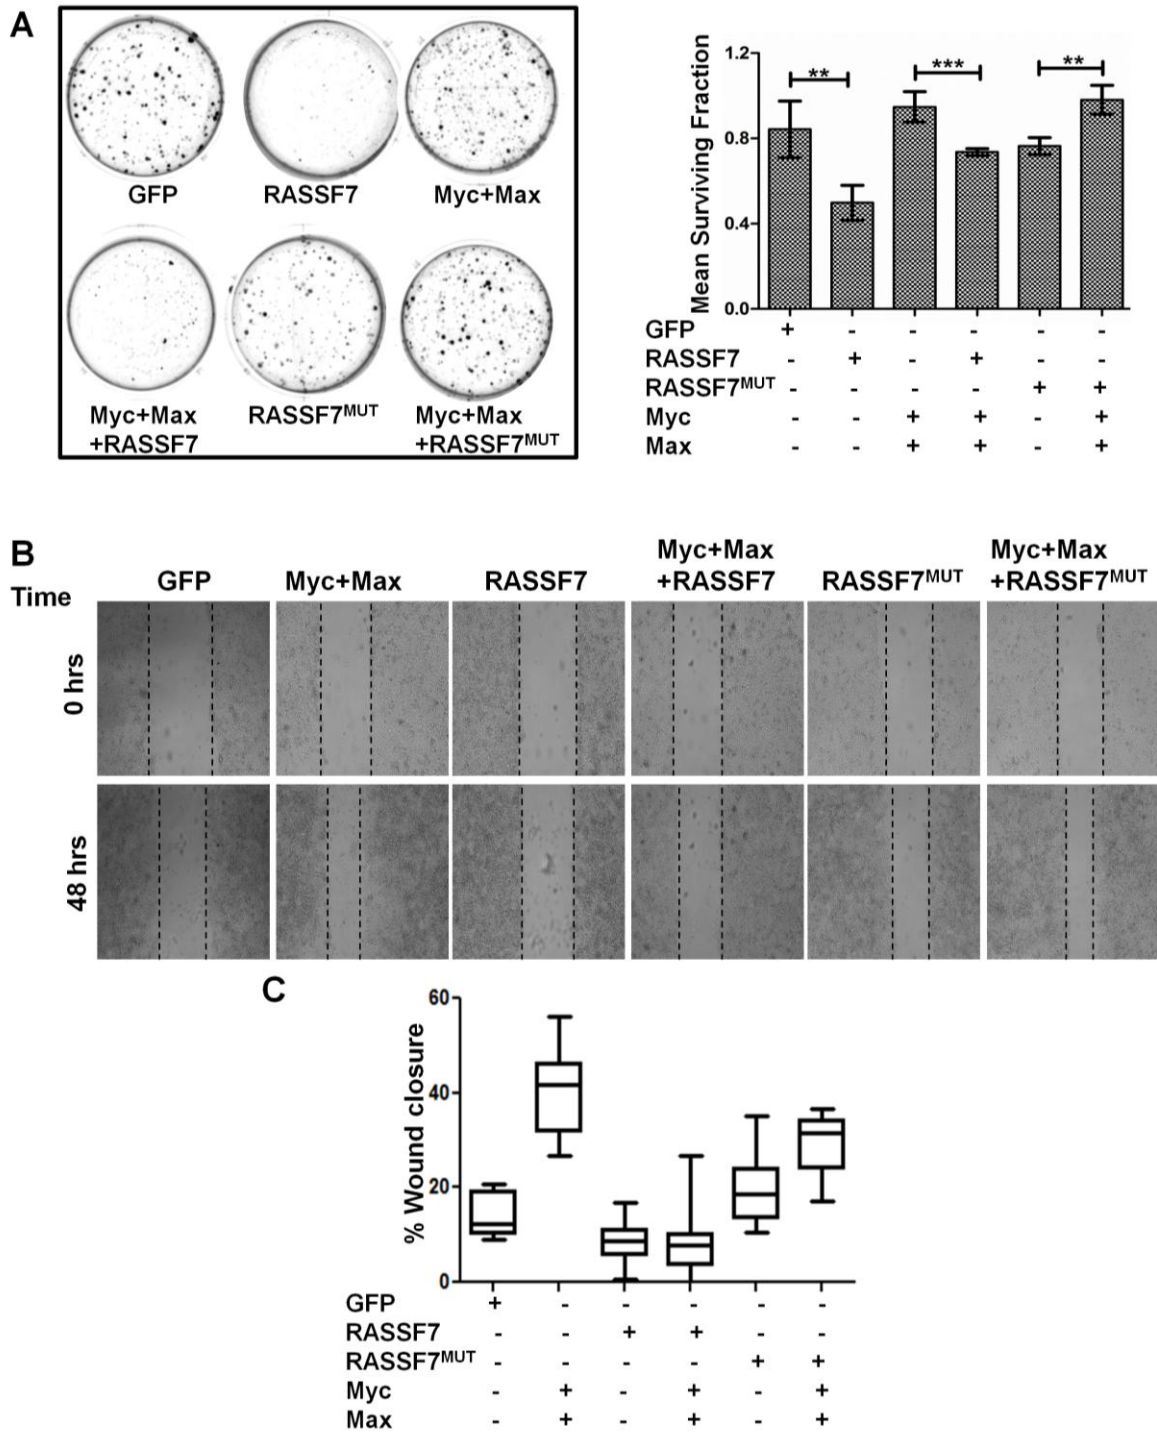

**Figure: S6**

**(A)** Representative Images of colony forming assay performed in HeLa cells indicated that c-Myc induced colony forming ability was inhibited by RASSF7<sup>WT</sup> but not RASSF7<sup>MUT</sup>. Colonies were counted using ImageJ and surviving fraction was calculated and plotted as bar diagram. (n=3 and data is expressed as mean ± SD). **(B)** HeLa cells were transiently expressed with indicated proteins and performed wound healing assay. Results indicate that c-Myc induced cell migration was inhibited by RASSF7<sup>WT</sup> but not RASSF7<sup>MUT</sup>. **(C)** Wound areas from the wound healing assay were analysed and %wound closure after 48 hours was calculated and plotted as box plots. (n=3 and data is expressed as mean ± SD).

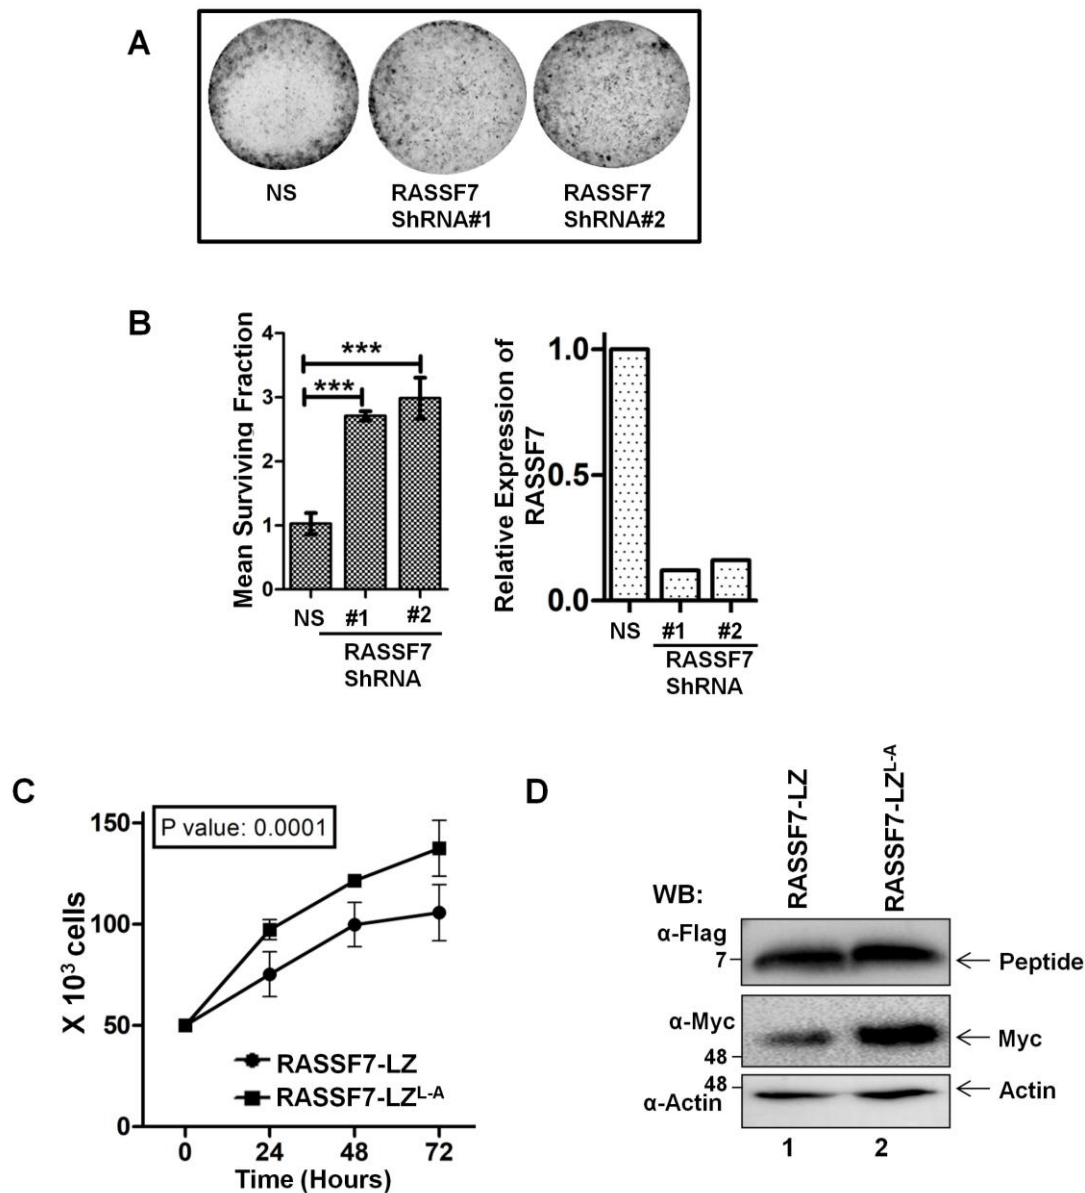

**Figure: S7**

**(A)** Immortalized NIH3T3 cells were transfected with RASSF7 shRNA plasmids and colony forming assay was performed. Results indicate that depletion of RASSF7 increased number of colonies. **(B)** Colonies from RASSF7 depleted NIH3T3 cells were counted using ImageJ and surviving fraction was calculated and plotted as bar diagram. (n=3 and data is expressed as mean  $\pm$  SD). Knockdown of RASSF7 was confirmed by RT-qPCR. Beta-actin served as internal control. **(C)** HEK293T cells showed decreased proliferation upon treatment with RASSF7-LZ peptide as revealed by cell counting performed at indicated time intervals. **(D)** Treatment of RASSF7-LZ peptide induces reduction in endogenous c-Myc levels in HEK293T cells.
